# Supplementary material
Source: PubMed Central journal article supplement (PMC6290363)
Supplement: nqy209_supplemental_file.pdf [file nqy209_supplemental_file.pdf]

**Supplemental Figure 1.** Flow Chart for Study Population

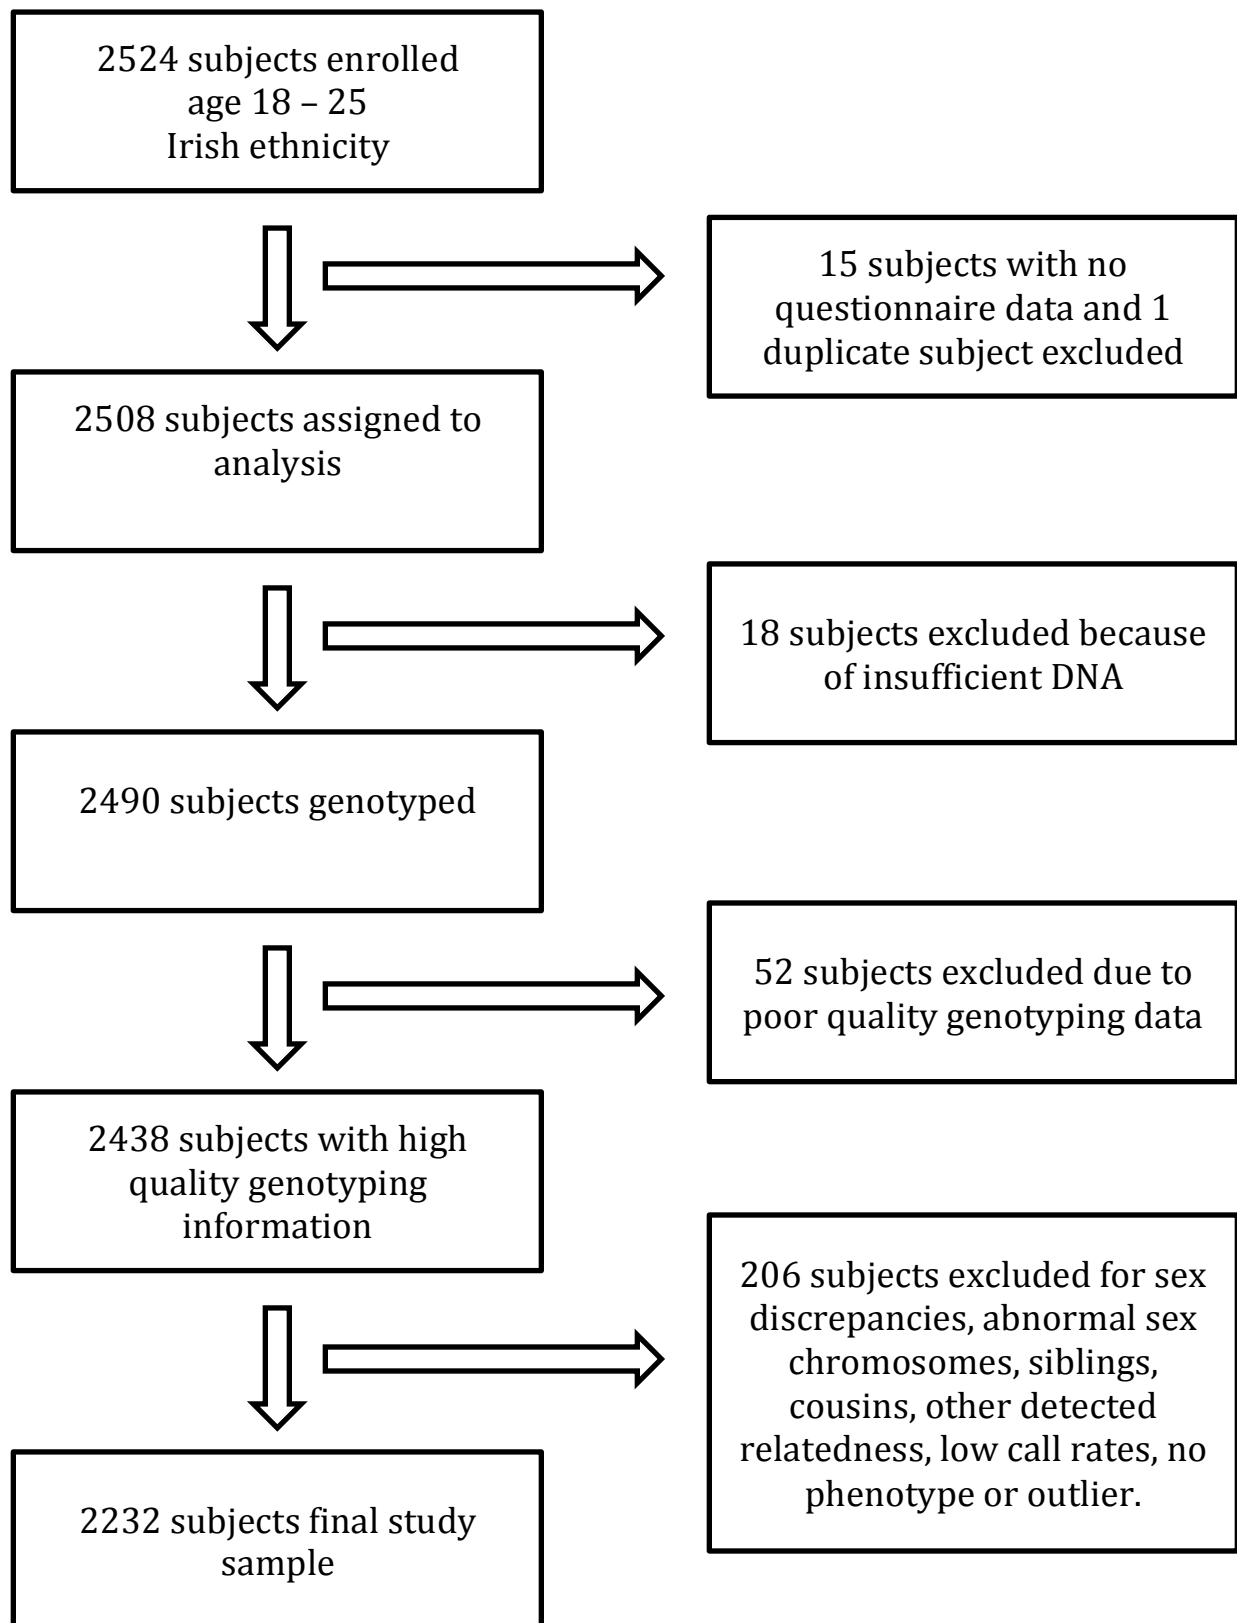

**Supplemental Table 1.** 76 SNPs used in Candidate Gene Analyses

---

| Gene  | SNP        | chromosome | position |
|-------|------------|------------|----------|
| MTHFR | rs4846048  | 1          | 11768839 |
| MTHFR | rs2184226  | 1          | 11770023 |
| MTHFR | rs3737966  | 1          | 11770346 |
| MTHFR | rs1537516  | 1          | 11770448 |
| MTHFR | rs1476413  | 1          | 11774887 |
| MTHFR | rs1801131  | 1          | 11777063 |
| MTHFR | rs1801133  | 1          | 11778965 |
| MTHFR | rs1572151  | 1          | 11780298 |
| MTHFR | rs4846052  | 1          | 11780538 |
| MTHFR | rs2066471  | 1          | 11783045 |
| MTHFR | rs13306567 | 1          | 11783052 |
| MTHFR | rs17037397 | 1          | 11784750 |
| MTHFR | rs9651118  | 1          | 11784801 |
| MTHFR | rs3753584  | 1          | 11787173 |
| MTHFR | rs3737964  | 1          | 11789631 |
| MTHFR | rs4846054  | 1          | 11791817 |
| DHFR  | rs1650723  | 5          | 79957786 |
| DHFR  | rs11951910 | 5          | 79975227 |
| DHFR  | rs863215   | 5          | 79983761 |
| DHFR  | rs1650697  | 5          | 79986537 |
| DHFR  | rs6151599  | 5          | 79986788 |
| DHFR  | rs380691   | 5          | 79987790 |

## Online Supporting Material

|               |            |    |           |
|---------------|------------|----|-----------|
| MFTC/SLC25A32 | rs3098259  | 8  | 104479596 |
| MFTC/SLC25A32 | rs1061196  | 8  | 104480104 |
| MFTC/SLC25A32 | rs3133810  | 8  | 104484294 |
| MFTC/SLC25A32 | rs17803441 | 8  | 104486221 |
| MFTC/SLC25A32 | rs3134295  | 8  | 104496535 |
| MFTC/SLC25A32 | rs750606   | 8  | 104497706 |
|               |            |    |           |
| FPGS          | rs1544105  | 9  | 129602546 |
| FPGS          | rs7856096  | 9  | 129606360 |
| FPGS          | rs10760503 | 9  | 129618225 |
|               |            |    |           |
| FOLH1         | rs6485964  | 11 | 49122813  |
| FOLH1         | rs16906158 | 11 | 49127350  |
| FOLH1         | rs34033751 | 11 | 49132803  |
| FOLH1         | rs7113251  | 11 | 49143860  |
| FOLH1         | rs3974729  | 11 | 49153523  |
| FOLH1         | rs588458   | 11 | 49170624  |
| FOLH1         | rs202700   | 11 | 49173275  |
|               |            |    |           |
| FOLR1         | rs2071010  | 11 | 71578612  |
|               |            |    |           |
| MTHFS         | rs685487   | 15 | 77923184  |
| MTHFS         | rs8923     | 15 | 77924615  |
| MTHFS         | rs2733103  | 15 | 77925626  |
| MTHFS         | rs17284990 | 15 | 77931252  |
| MTHFS         | rs16971450 | 15 | 77941626  |
| MTHFS         | rs6495446  | 15 | 77942037  |

## Online Supporting Material

|              |            |    |          |
|--------------|------------|----|----------|
| MTHFS        | rs7177659  | 15 | 77945097 |
| MTHFS        | rs6495449  | 15 | 77945214 |
| MTHFS        | rs17285431 | 15 | 77949320 |
| MTHFS        | rs6495451  | 15 | 77951108 |
| MTHFS        | rs2562744  | 15 | 77961443 |
| MTHFS        | rs2733106  | 15 | 77964742 |
| MTHFS        | rs12438477 | 15 | 77965338 |
| MTHFS        | rs2586182  | 15 | 77970821 |
| MTHFS        | rs2733088  | 15 | 77971712 |
| MTHFS        | rs12440798 | 15 | 77973395 |
| MTHFS        | rs2115540  | 15 | 77977363 |
| MTHFS        | rs2163005  | 15 | 77981535 |
| PCFT/SLC46A1 | rs4795434  | 17 | 23741044 |
| PCFT/SLC46A1 | rs11656835 | 17 | 23741176 |
| PCFT/SLC46A1 | rs2239910  | 17 | 23747793 |
| PCFT/SLC46A1 | rs739439   | 17 | 23747949 |
| PCFT/SLC46A1 | rs2239907  | 17 | 23749871 |
| PCFT/SLC46A1 | rs17719944 | 17 | 23753580 |
| RFC/SLC19A1  | rs2838952  | 21 | 45754591 |
| RFC/SLC19A1  | rs12483377 | 21 | 45755537 |
| RFC/SLC19A1  | rs2236484  | 21 | 45756112 |
| RFC/SLC19A1  | rs7499     | 21 | 45756756 |
| RFC/SLC19A1  | rs17004785 | 21 | 45757046 |
| RFC/SLC19A1  | rs7867     | 21 | 45757080 |
| RFC/SLC19A1  | rs2838956  | 21 | 45769452 |

## Online Supporting Material

|             |           |    |          |
|-------------|-----------|----|----------|
| RFC/SLC19A1 | rs2838958 | 21 | 45772995 |
| RFC/SLC19A1 | rs4818789 | 21 | 45773255 |
| RFC/SLC19A1 | rs12659   | 21 | 45775984 |
| RFC/SLC19A1 | rs1051269 | 21 | 45776434 |
| RFC/SLC19A1 | rs3788205 | 21 | 45788806 |
| RFC/SLC19A1 | rs1023159 | 21 | 45790608 |

---

Online Supporting Material

**Supplemental Table 2.** SNPs that reached genome-wide significance in association with log-transformed red cell folate in 2232 Irish participants ( $p < 5 \times 10^{-08}$ ). Data adjusted for age and gender.

| gene  | SNP        | CHR | BP       | N    | BETA    | SE       | R <sup>2</sup> | <sup>1</sup> H <sup>2</sup> a | P value                | <sup>2</sup> P value<br>677CC |
|-------|------------|-----|----------|------|---------|----------|----------------|-------------------------------|------------------------|-------------------------------|
| MTHFR | RS1801133  | 1   | 11778965 | 2229 | -0.0463 | 0.005379 | 0.03221        | 0.0680                        | $1.37 \times 10^{-17}$ | -                             |
| MTHFR | RS13306561 | 1   | 11788391 | 2228 | 0.04649 | 0.006782 | 0.02067        | 0.0202                        | $9.22 \times 10^{-12}$ | $8.93 \times 10^{-4}$         |
| MTHFR | RS3753584  | 1   | 11787173 | 2230 | 0.04631 | 0.006781 | 0.02051        | 0.0200                        | $1.09 \times 10^{-11}$ | $1.01 \times 10^{-3}$         |
| MTHFR | RS17367504 | 1   | 11785365 | 2229 | 0.04631 | 0.006784 | 0.02049        | 0.0200                        | $1.12 \times 10^{-11}$ | $7.36 \times 10^{-4}$         |
| MTHFR | RS17037390 | 1   | 11783430 | 2227 | 0.04542 | 0.006754 | 0.01992        | 0.0193                        | $2.22 \times 10^{-11}$ | $8.74 \times 10^{-4}$         |
| CLCN6 | RS2050265  | 1   | 11802286 | 2230 | 0.04538 | 0.006789 | 0.01966        | 0.0191                        | $2.93 \times 10^{-11}$ | $1.86 \times 10^{-3}$         |
| CLCN6 | RS198358   | 1   | 11826663 | 2229 | 0.0392  | 0.005873 | 0.01961        | 0.0196                        | $3.12 \times 10^{-11}$ | .014                          |
| CLCN6 | RS7537765  | 1   | 11809890 | 2230 | 0.04522 | 0.006788 | 0.01953        | 0.0190                        | $3.39 \times 10^{-11}$ | $2.06 \times 10^{-3}$         |
| CLCN6 | RS17037452 | 1   | 11818262 | 2228 | 0.0452  | 0.006792 | 0.0195         | 0.0190                        | $3.57 \times 10^{-11}$ | $2.02 \times 10^{-3}$         |
| CLCN6 | RS12567136 | 1   | 11806318 | 2228 | 0.04501 | 0.006799 | 0.01931        | 0.0189                        | $4.48 \times 10^{-11}$ | $2.48 \times 10^{-3}$         |
| CLCN6 | RS503040   | 1   | 11813282 | 2229 | 0.03372 | 0.005154 | 0.01886        | 0.0184                        | $7.49 \times 10^{-11}$ | > 0.05                        |
| CLCN6 | RS198401   | 1   | 11810971 | 2227 | 0.03364 | 0.005149 | 0.01882        | 0.0183                        | $7.94 \times 10^{-11}$ | > 0.05                        |
| CLCN6 | RS535107   | 1   | 11812055 | 2230 | 0.03369 | 0.005157 | 0.0188         | 0.0183                        | $7.95 \times 10^{-11}$ | > 0.05                        |
| CLCN6 | RS198406   | 1   | 11820179 | 2230 | 0.03337 | 0.005133 | 0.01862        | 0.0179                        | $9.77 \times 10^{-11}$ | > 0.05                        |
| CLCN6 | RS198408   | 1   | 11820717 | 2224 | 0.03319 | 0.005138 | 0.01843        | 0.0177                        | $1.28 \times 10^{-10}$ | > 0.05                        |
| CLCN6 | RS198391   | 1   | 11799004 | 2228 | 0.03312 | 0.005165 | 0.01814        | 0.0177                        | $1.74 \times 10^{-10}$ | > 0.05                        |
| CLCN6 | RS198393   | 1   | 11802272 | 2230 | 0.03293 | 0.005136 | 0.01811        | 0.0175                        | $1.76 \times 10^{-10}$ | > 0.05                        |
| CLCN6 | RS12406667 | 1   | 11796438 | 2230 | 0.03297 | 0.005157 | 0.01802        | 0.0176                        | $1.97 \times 10^{-10}$ | > 0.05                        |
| CLCN6 | RS198392   | 1   | 11801749 | 2229 | 0.03291 | 0.005148 | 0.01802        | 0.0174                        | $1.99 \times 10^{-10}$ | > 0.05                        |

## Online Supporting Material

|          |            |   |          |      |          |          |         |        |                        |                       |
|----------|------------|---|----------|------|----------|----------|---------|--------|------------------------|-----------------------|
| MTHFR    | RS6541003  | 1 | 11778454 | 2230 | 0.03278  | 0.005164 | 0.01777 | 0.0172 | $2.63 \times 10^{-10}$ | > 0.05                |
| MTHFR    | RS3737966  | 1 | 11770346 | 2229 | 0.03296  | 0.005221 | 0.01759 | 0.0175 | $3.28 \times 10^{-10}$ | > 0.05                |
| NPPB     | RS198389   | 1 | 11841858 | 2229 | 0.0327   | 0.005204 | 0.01742 | 0.0173 | $3.96 \times 10^{-10}$ | > 0.05                |
| CLCN6    | RS17037425 | 1 | 11792970 | 2230 | 0.044    | 0.007033 | 0.01726 | 0.0168 | $4.73 \times 10^{-10}$ | $2.77 \times 10^{-3}$ |
| MTHFR    | RS4846052  | 1 | 11780538 | 2229 | 0.03212  | 0.00515  | 0.01717 | 0.0166 | $5.31 \times 10^{-10}$ | > 0.05                |
| CLCN6    | RS4846054  | 1 | 11791817 | 2229 | 0.03166  | 0.005171 | 0.01656 | 0.0160 | $1.08 \times 10^{-9}$  | > 0.05                |
| NPPA     | RS632793   | 1 | 11833264 | 2229 | 0.03198  | 0.005249 | 0.01639 | 0.0162 | $1.31 \times 10^{-9}$  | > 0.05                |
| NPPB     | RS198388   | 1 | 11839927 | 2229 | 0.03166  | 0.005224 | 0.01622 | 0.0162 | $1.60 \times 10^{-9}$  | > 0.05                |
| NPPB     | RS198375   | 1 | 11836344 | 2230 | 0.03161  | 0.005269 | 0.01589 | 0.0157 | $2.32 \times 10^{-9}$  | > 0.05                |
| NPPB     | RS1318408  | 1 | 11848368 | 2229 | 0.04467  | 0.007682 | 0.01495 | 0.0146 | $6.95 \times 10^{-9}$  | $8.14 \times 10^{-4}$ |
| NPPB     | RS12562952 | 1 | 11849643 | 2230 | 0.0464   | 0.008024 | 0.01479 | 0.0147 | $8.39 \times 10^{-9}$  | $2.35 \times 10^{-3}$ |
| KIAA2013 | RS2639453  | 1 | 11905131 | 2229 | -0.03421 | 0.006251 | 0.01327 | 0.0276 | $4.93 \times 10^{-8}$  | > 0.05                |
| MTHFR    | RS4846049  | 1 | 11772952 | 2229 | 0.02969  | 0.005436 | 0.01322 | 0.0125 | $5.22 \times 10^{-8}$  | > 0.05                |

---

SNPs were tested using a simple linear regression model executed in PLINK v.1.7 under the assumption of an additive genetic model.

<sup>1</sup>  $H^2_a$  is locus specific heritability (variance of additive model / variance of phenotype)

<sup>2</sup> P-value for SNP association in MTHFR 677CC homozygous subjects (n = 989).

## Online Supporting Material

**Supplemental Table 3.** SNPs that reached genome-wide significance in association with log-transformed serum folate in 2232 Irish participants ( $p < 5 \times 10^{-08}$ ). Data adjusted for age and gender.

---

| gene      | SNP        | CHR | BP       | N    | BETA     | SE       | R <sup>2</sup> | P value                | <sup>1</sup> P value<br>677CC |
|-----------|------------|-----|----------|------|----------|----------|----------------|------------------------|-------------------------------|
| MTHFR     | RS1801133  | 1   | 11778965 | 2230 | -0.04932 | 0.007373 | 0.01969        | $2.82 \times 10^{-11}$ | -                             |
| LOC390997 | RS7545014  | 1   | 11857240 | 2229 | -0.04013 | 0.006977 | 0.01464        | $1.01 \times 10^{-8}$  | $1.35 \times 10^{-4}$         |
| LOC390997 | RS7554327  | 1   | 11859991 | 2230 | -0.03998 | 0.006987 | 0.01448        | $1.20 \times 10^{-8}$  | $1.07 \times 10^{-4}$         |
| RNU5E     | RS1999594  | 1   | 11881803 | 2230 | 0.03981  | 0.006996 | 0.01433        | $1.43 \times 10^{-8}$  | $7.74 \times 10^{-3}$         |
| RNU5E     | RS12085006 | 1   | 11881310 | 2229 | 0.03964  | 0.007004 | 0.01418        | $1.71 \times 10^{-8}$  | $7.52 \times 10^{-3}$         |

---

SNPs were tested using a simple linear regression model executed in PLINK v.1.7 under the assumption of an additive genetic model.

<sup>1</sup> P-value for SNP association in MTHFR 677CC homozygous subjects (n = 989).



Online Supporting Material

**Supplemental Table 4.** SNPs that reached genome-wide significance in association with log-transformed plasma total homocysteine in 2232 Irish participants ( $p < 5 \times 10^{-08}$ ). Data adjusted for age and gender.

| gene      | SNP        | CHR | BP       | N    | BETA     | SE       | R <sup>2</sup> | <sup>1</sup> H2a | P value                  | <sup>2</sup> P value<br>677CC |
|-----------|------------|-----|----------|------|----------|----------|----------------|------------------|--------------------------|-------------------------------|
| MTHFR     | RS1801133  | 1   | 11778965 | 2229 | 0.03087  | 0.003374 | 0.03623        | 0.0353           | 1.26 x 10 <sup>-19</sup> | -                             |
| RNU5E     | RS1999594  | 1   | 11881803 | 2229 | -0.02195 | 0.003217 | 0.02048        | 0.0173           | 1.14 x 10 <sup>-11</sup> | > 0.05                        |
| RNU5E     | RS12085006 | 1   | 11881310 | 2228 | -0.02186 | 0.003221 | 0.02028        | 0.0172           | 1.45 x 10 <sup>-11</sup> | > 0.05                        |
| RNU5E     | RS12724129 | 1   | 11880226 | 2229 | -0.0197  | 0.003292 | 0.01583        | 0.0114           | 2.51 x 10 <sup>-9</sup>  | > 0.05                        |
| MFN2      | RS4240897  | 1   | 11965342 | 2229 | -0.01945 | 0.003287 | 0.01548        | 0.0124           | 3.76 x 10 <sup>-9</sup>  | > 0.05                        |
| TWISTNB   | RS17354370 | 7   | 19566392 | 2230 | -0.02096 | 0.003546 | 0.01544        | 0.0134           | 3.93 x 10 <sup>-9</sup>  | .0047                         |
| LOC390997 | RS2050267  | 1   | 11869160 | 2227 | -0.01981 | 0.003356 | 0.01541        | 0.0077           | 4.14 x 10 <sup>-9</sup>  | > 0.05                        |
| LOC390997 | RS4846069  | 1   | 11871618 | 2220 | -0.01973 | 0.00336  | 0.01531        | 0.0082           | 4.95 x 10 <sup>-9</sup>  | > 0.05                        |
| LOC390997 | RS2050270  | 1   | 11869043 | 2230 | -0.01968 | 0.003354 | 0.01522        | 0.0076           | 5.08 x 10 <sup>-9</sup>  | > 0.05                        |
| TWISTNB   | RS2024353  | 7   | 19545401 | 2230 | -0.02142 | 0.003651 | 0.01522        | 0.0102           | 5.09 x 10 <sup>-9</sup>  | .011                          |
| LOC390997 | RS2050268  | 1   | 11869131 | 2230 | -0.01968 | 0.003355 | 0.01521        | 0.0076           | 5.14 x 10 <sup>-9</sup>  | > 0.05                        |
| MFN2      | RS730123   | 1   | 11992879 | 2230 | 0.01915  | 0.003298 | 0.0149         | 0.0148           | 7.32 x 10 <sup>-9</sup>  | > 0.05                        |
| LOC390997 | RS2336377  | 1   | 11872557 | 2222 | 0.0187   | 0.003251 | 0.01469        | 0.0142           | 1.00 x 10 <sup>-8</sup>  | > 0.05                        |
| LOC390997 | RS1321072  | 1   | 11873905 | 2229 | -0.0193  | 0.003357 | 0.01463        | 0.0083           | 1.02 x 10 <sup>-8</sup>  | > 0.05                        |
| TWISTNB   | RS4721780  | 7   | 19515433 | 2229 | -0.02012 | 0.00351  | 0.01453        | 0.0101           | 1.13 x 10 <sup>-8</sup>  | .029                          |
| LOC390997 | RS12749498 | 1   | 11875214 | 2230 | -0.01913 | 0.003354 | 0.01438        | 0.0080           | 1.34 x 10 <sup>-8</sup>  | > 0.05                        |
| LOC390997 | RS1321073  | 1   | 11874213 | 2230 | -0.01913 | 0.003354 | 0.01438        | 0.0080           | 1.34 x 10 <sup>-8</sup>  | > 0.05                        |
| LOC390997 | RS17037520 | 1   | 11874993 | 2230 | -0.01913 | 0.003354 | 0.01438        | 0.0080           | 1.34 x 10 <sup>-8</sup>  | > 0.05                        |
| LOC390997 | RS2065611  | 1   | 11876113 | 2230 | -0.01913 | 0.003354 | 0.01438        | 0.0080           | 1.34 x 10 <sup>-8</sup>  | > 0.05                        |

## Online Supporting Material

|              |            |    |          |      |          |          |         |        |                       |                       |
|--------------|------------|----|----------|------|----------|----------|---------|--------|-----------------------|-----------------------|
| LOC390997    | RS4845886  | 1  | 11871247 | 2230 | -0.01913 | 0.003354 | 0.01438 | 0.0080 | $1.34 \times 10^{-8}$ | > 0.05                |
| LOC390997    | RS12036266 | 1  | 11875901 | 2229 | -0.0191  | 0.003355 | 0.01434 | 0.0080 | $1.41 \times 10^{-8}$ | > 0.05                |
| RNU5E        | RS12756891 | 1  | 11879071 | 2226 | -0.01911 | 0.003358 | 0.01435 | 0.0080 | $1.44 \times 10^{-8}$ | > 0.05                |
| RNU5E        | RS4846076  | 1  | 11879352 | 2219 | -0.01916 | 0.003368 | 0.01439 | 0.0080 | $1.45 \times 10^{-8}$ | > 0.05                |
| MFN2         | RS3753579  | 1  | 11961178 | 2229 | -0.01895 | 0.003386 | 0.01387 | 0.0073 | $2.45 \times 10^{-8}$ | > 0.05                |
| TWISTNB      | RS10245919 | 7  | 19516175 | 2224 | -0.01919 | 0.003448 | 0.01375 | 0.0102 | $2.93 \times 10^{-8}$ | .030                  |
| LOC390997    | RS4314892  | 1  | 11872424 | 2186 | -0.01866 | 0.00338  | 0.01376 | 0.0075 | $3.81 \times 10^{-8}$ | > 0.05                |
| CHMP1A       | RS164746   | 16 | 88236520 | 2228 | 0.01776  | 0.003219 | 0.01349 | 0.0131 | $3.85 \times 10^{-8}$ | $5.76 \times 10^{-5}$ |
| CHMP1A/DPEP1 | RS154657   | 16 | 88235597 | 2230 | 0.01774  | 0.003217 | 0.01346 | 0.0131 | $3.91 \times 10^{-8}$ | $5.49 \times 10^{-5}$ |
| RNU5E        | RS10779767 | 1  | 11886826 | 2202 | -0.01948 | 0.003546 | 0.01354 | 0.0059 | $4.38 \times 10^{-8}$ | > 0.05                |

---

SNPs were tested using a simple linear regression model executed in PLINK v.1.7 under the assumption of an additive genetic model.

<sup>1</sup>  $H^2_a$  is locus specific heritability (variance of additive model / variance of phenotype)

<sup>2</sup> P-value for SNP association in MTHFR 677CC homozygous subjects (n = 989).

Online Supporting Material

A

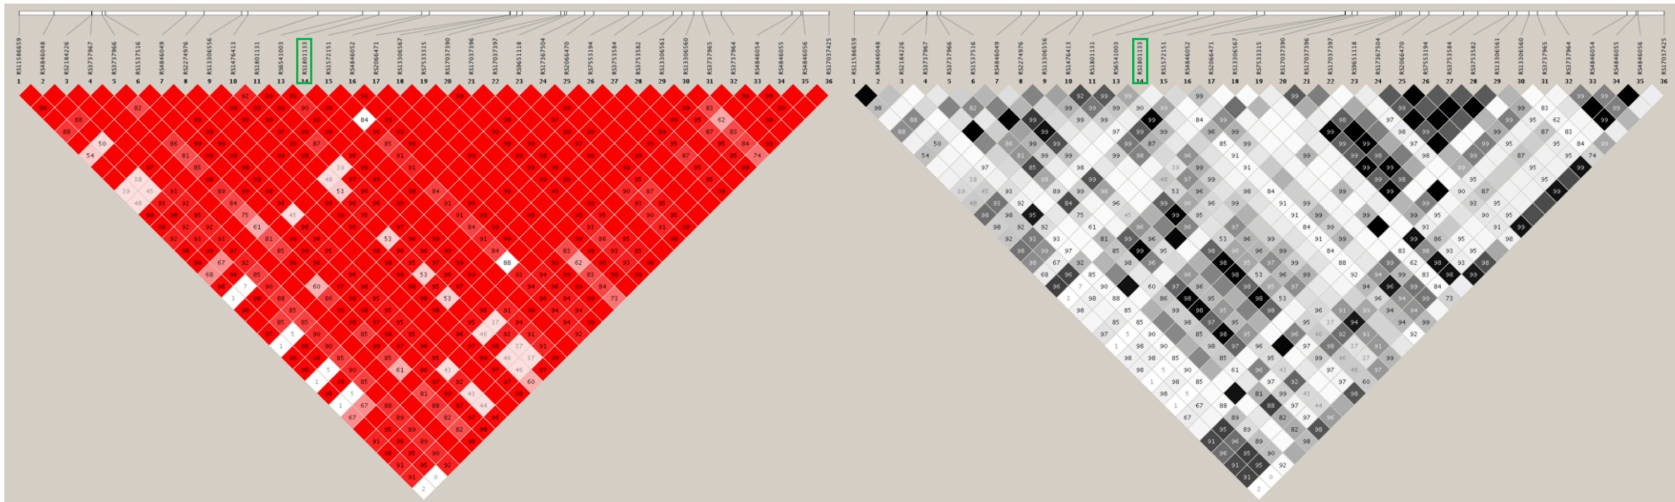

B

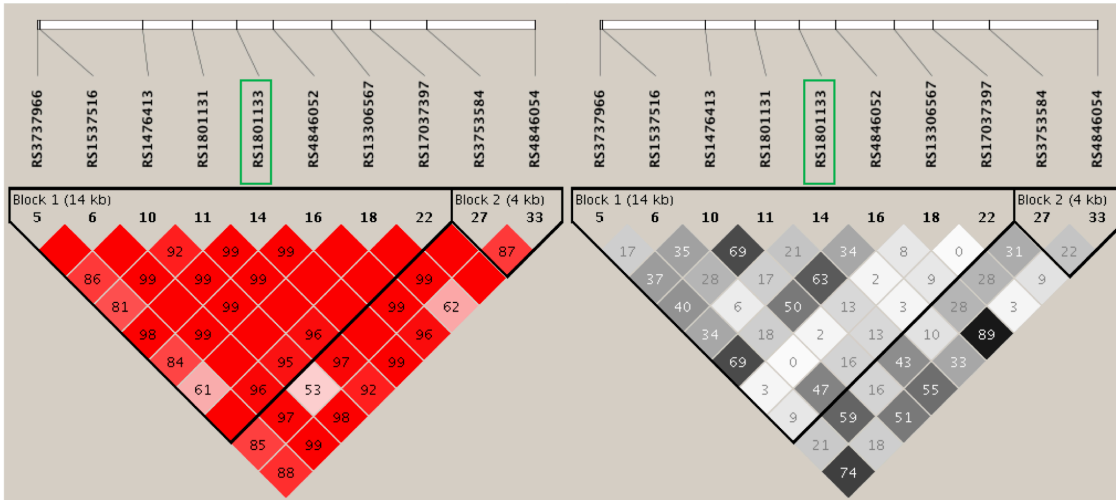

C

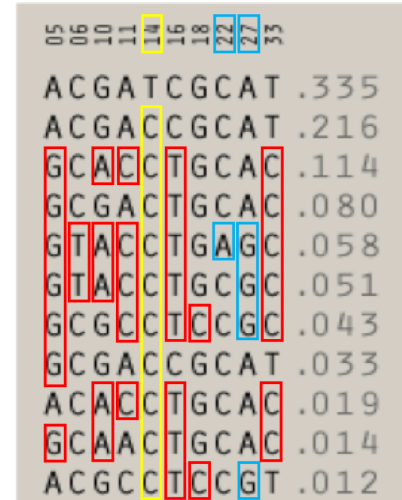

## Online Supporting Material

**Supplemental Figure 2.** Linkage disequilibrium (LD) in the *MTHFR* gene region. **A)**  $D'$  (left) and  $r^2$  (right) plots of pairwise LD measures are shown for 35 SNPs in *MTHFR* and its 5kb flanks. SNPs are numbered sequentially from left to right, with the SNP IDs shown above. *MTHFR* 677C>T (rs1801133) is boxed in green in each plot. A subset of 16 tagSNPs were selected for association analyses. **B)**  $D'$  (left) and  $r^2$  (right) plots of pairwise LD measures are shown for 10 SNPs in *MTHFR* that are associated with red cell folate (RCF) after correction for multiple tests (Table 2). SNPs numbering is preserved from (A), and the SNP IDs are shown above. The *MTHFR* 677C>T rs1801133 label is boxed in green in each plot. Adjacent to it is *MTHFR* 1298 A>C (rs1801131, SNP 11). **C)** Haplotypes and their frequencies (right column) are shown for the 10 SNPs in (B) (numbering and SNP IDs are preserved). Alleles that are associated with higher levels of RCF are boxed in color: yellow, *MTHFR* 677C>T (rs1801133); red, SNP alleles that are not associated with changes in RCF in *MTHFR* 677CC homozygotes; blue, SNP alleles that are associated with increased RCF in *MTHFR* 677CC homozygotes.
